# Supplementary material for: Revealing SO2 and CO2 adsorption features on forsterite via IR spectroscopy and automated computational approaches
Source: Royal Society of Chemistry journal article supplement (doi:10.1039/d5cp01699a), 2025-01-01
Supplement: d5cp01699a1.pdf [file d5cp01699a1.pdf]

## Electronic Supplementary Information

### Revealing SO<sub>2</sub> and CO<sub>2</sub> Adsorption Features on Forsterite via IR Spectroscopy and Automated Computational Approaches

Guillermo Escolano Casado<sup>2‡</sup>, Eric Mates-Torres<sup>1‡</sup>, Lorenzo Mino<sup>2</sup>, Nadia Balucani<sup>3</sup>, Piero Ugliengo<sup>2</sup>, Albert Rimola<sup>1\*</sup>

<sup>1</sup> Departament de Química, Universitat Autònoma de Barcelona, 08193 Bellaterra, Catalonia, Spain

<sup>2</sup> Dipartimento di Chimica and Nanomaterials for Industry and Sustainability (NIS) Centre, Università degli Studi di Torino, via P. Giuria 7, I-10125, Torino, Italy

<sup>3</sup> Dipartimento di Chimica, Biologia e Biotecnologie, Università degli Studi di Perugia, Via Elce di Sotto 8, I-06123 Perugia, Italy

† Present address: Department of Chemistry and Biochemistry, Mendel University in Brno, Zemedelska 1, CZ-613 00, Brno, Czech Republic

‡ These authors contributed equally to this work

\*Correspondence: eric.mates@uab.cat, lorenzo.mino@unito.it, albert.rimola@uab.cat

**Table S1.** Miller indices in the Pbnm and standard Pnma notations of the forsterite space group, along with the surface energies at the PBE-ID3 level and the fraction that each termination occupies on the crystal equilibrium shape of forsterite obtained with the Wulff construction method.

| Miller index (Pbnm) | Miller index (Pnma) | Surface energy (J m <sup>-2</sup> ) | Equilibrium shape fraction |
|---------------------|---------------------|-------------------------------------|----------------------------|
| (010)               | (001)               | 1.32                                | <b>0.198</b>               |
| (120)               | (102)               | 1.41                                | <b>0.331</b>               |
| (101)               | (110)               | 1.68                                | <b>0.153</b>               |
| (001)               | (010)               | 1.71                                | <b>0.155</b>               |
| (111)               | (111)               | 1.76                                | <b>0.115</b>               |
| (110)               | (101)               | 1.81                                | <b>0.000</b>               |
| (021)               | (012)               | 1.92                                | <b>0.047</b>               |

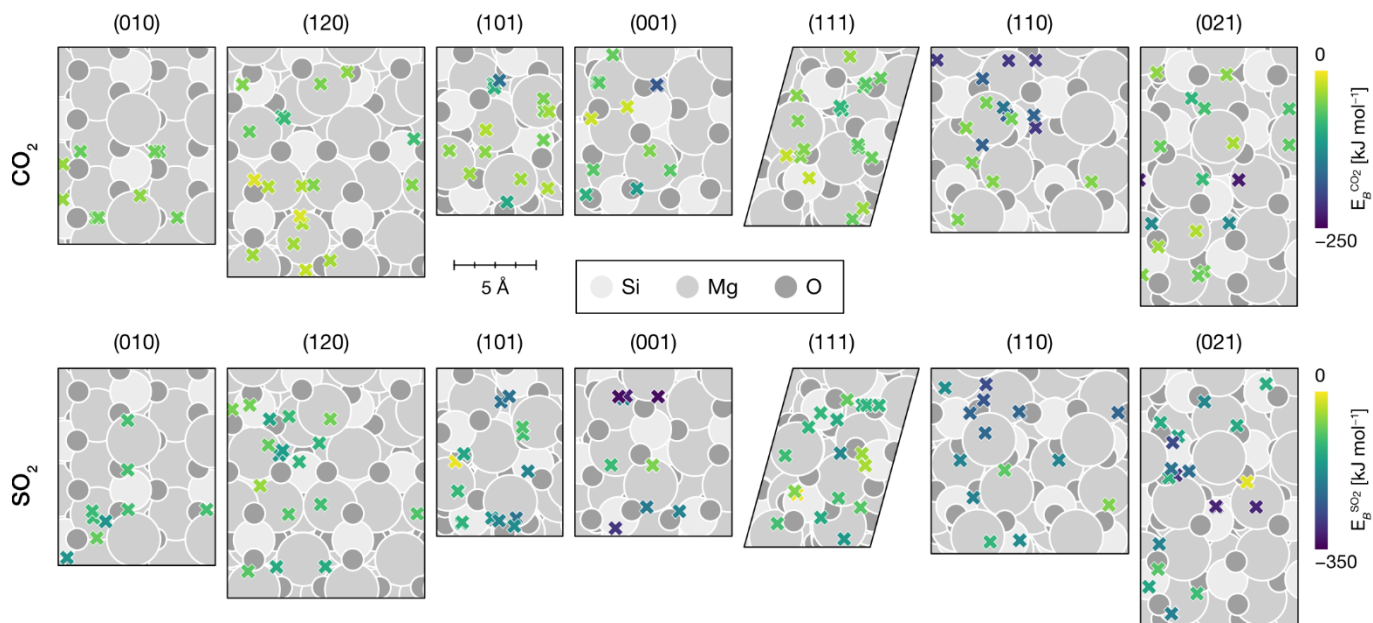

**Figure S1.** Top view of the surface unit cells depicting the molecular adsorption sites for CO<sub>2</sub> and SO<sub>2</sub>. Adsorption sites are denoted as  $\times$  symbols on the surface and correspond to the XY coordinates of the center of mass of the adsorbate in its final, optimal position at the DFT level. Atoms belonging to the surface have been colored in grayscale for readability.

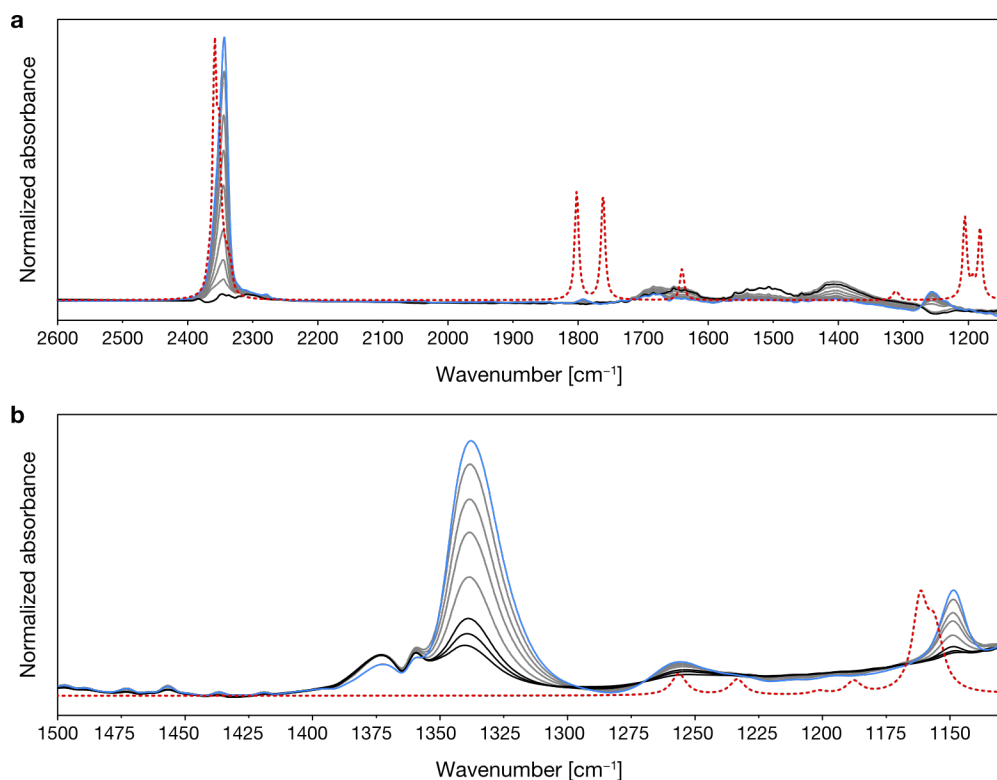

**Figure S2.** Experimental IR spectra of a) CO<sub>2</sub> and b) SO<sub>2</sub> on crystalline Mg-silicate at progressively increasing temperatures (from blue to black lines); the Boltzmann and Wulff-weighted theoretical total IR spectra are added as dotted red lines for direct comparison.

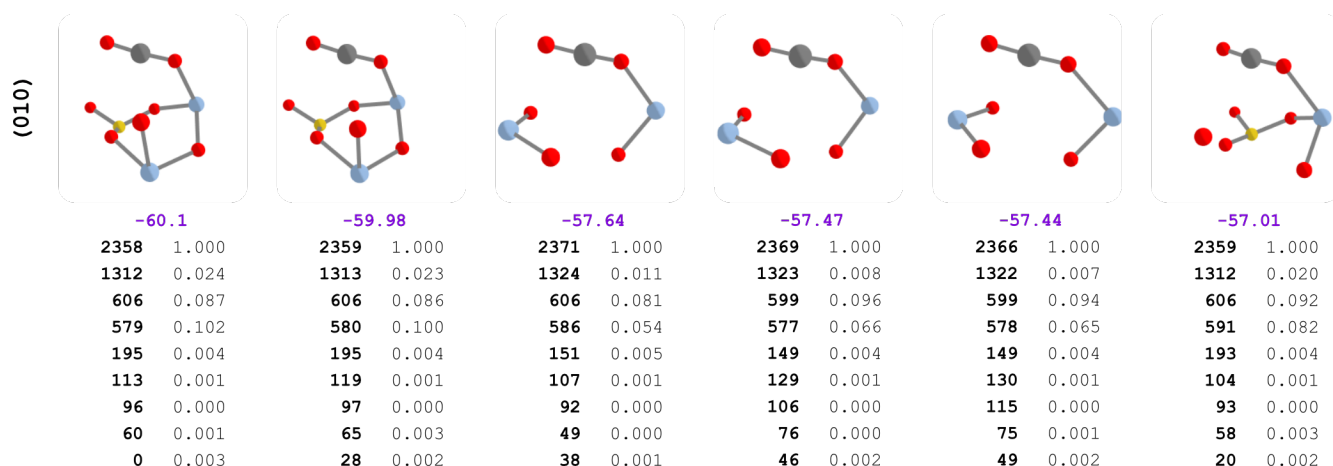

**Figure S3.** Atomic representations of the 6  $\text{CO}_2$  adsorption configurations displaying the lowest adsorption energies on the (010) surface of  $\text{Mg}_2\text{SiO}_4$  in our calculations. Only atoms within a radius of 4 Å from the C center are displayed. Adsorption energies are denoted in purple, in  $\text{kJ mol}^{-1}$ . The arising spectroscopic features from these adsorptions are displayed under the adsorption energy, where the first column is the wavenumber in  $\text{cm}^{-1}$ , and the second column is the normalized intensity. Blue, dark yellow, red and gray balls represent Mg, Si, O and C atoms, respectively.

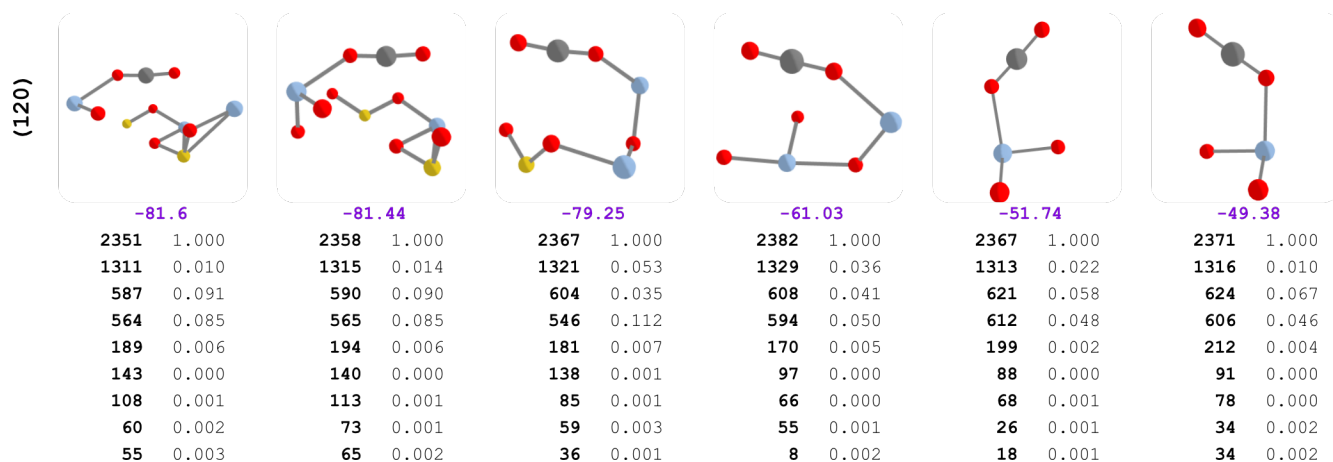

**Figure S4.** Atomic representations of the 6  $\text{CO}_2$  adsorption configurations displaying the lowest adsorption energies on the (120) surface of  $\text{Mg}_2\text{SiO}_4$  in our calculations. Only atoms within a radius of 4 Å from the C center are displayed. Adsorption energies are denoted in purple, in  $\text{kJ mol}^{-1}$ . The arising spectroscopic features from these adsorptions are displayed under the adsorption energy, where the first column is the wavenumber in  $\text{cm}^{-1}$ , and the second column is the normalized intensity. Blue, dark yellow, red and gray balls represent Mg, Si, O and C atoms, respectively.

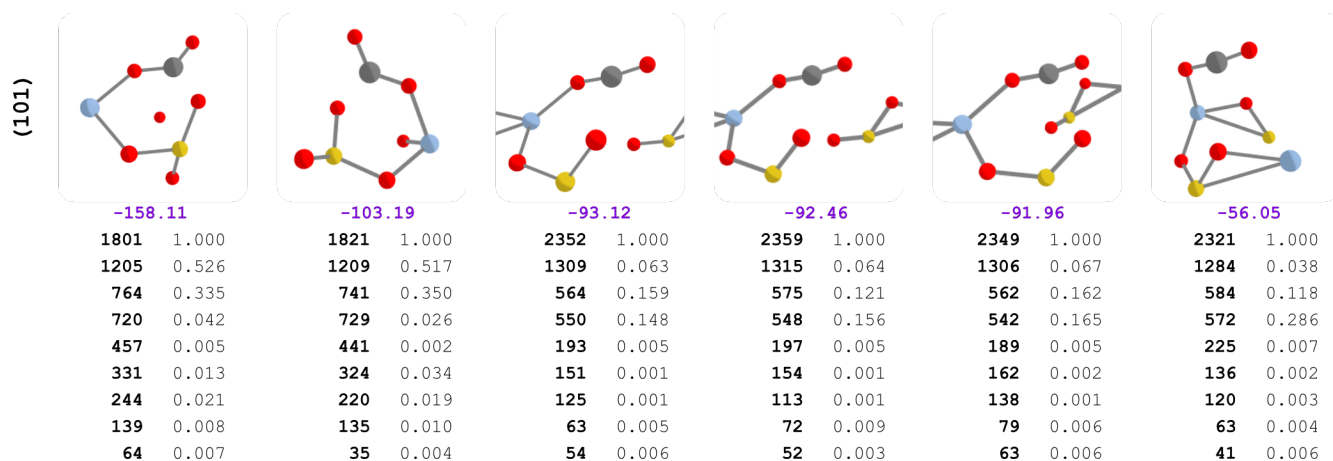

**Figure S5.** Atomic representations of the 6  $\text{CO}_2$  adsorption configurations displaying the lowest adsorption energies on the (101) surface of  $\text{Mg}_2\text{SiO}_4$  in our calculations. Only atoms within a radius of 4 Å from the C center are displayed. Adsorption energies are denoted in purple, in  $\text{kJ mol}^{-1}$ . The arising spectroscopic features from these adsorptions are displayed under the adsorption energy, where the first column is the wavenumber in  $\text{cm}^{-1}$ , and the second column is the normalized intensity. Blue, dark yellow, red and gray balls represent Mg, Si, O and C atoms, respectively.

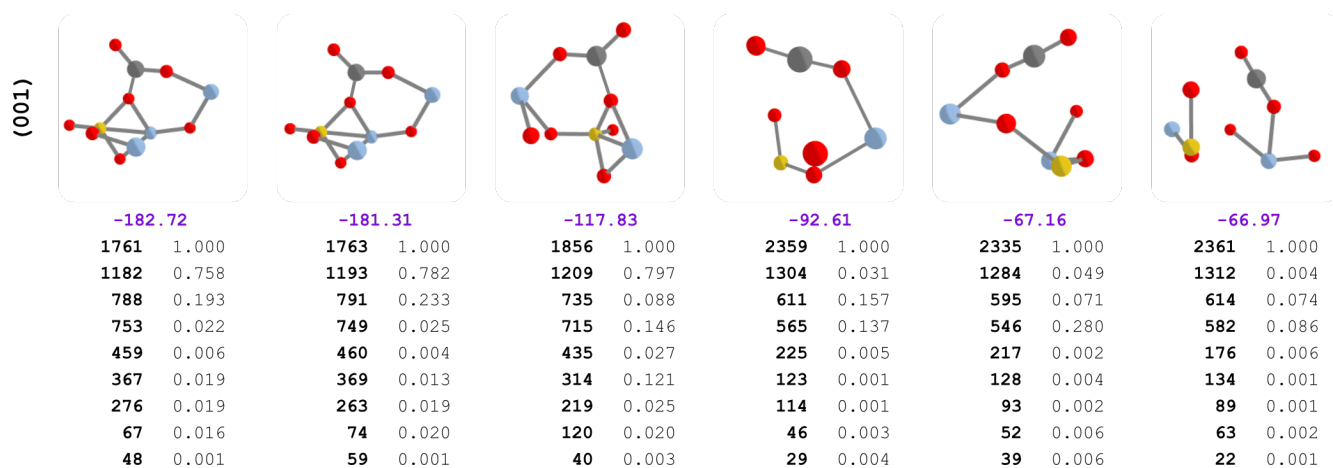

**Figure S6.** Atomic representations of the 6  $\text{CO}_2$  adsorption configurations displaying the lowest adsorption energies on the (001) surface of  $\text{Mg}_2\text{SiO}_4$  in our calculations. Only atoms within a radius of 4 Å from the C center are displayed. Adsorption energies are denoted in purple, in  $\text{kJ mol}^{-1}$ . The arising spectroscopic features from these adsorptions are displayed under the adsorption energy, where the first column is the wavenumber in  $\text{cm}^{-1}$ , and the second column is the normalized intensity. Blue, dark yellow, red and gray balls represent Mg, Si, O and C atoms, respectively.

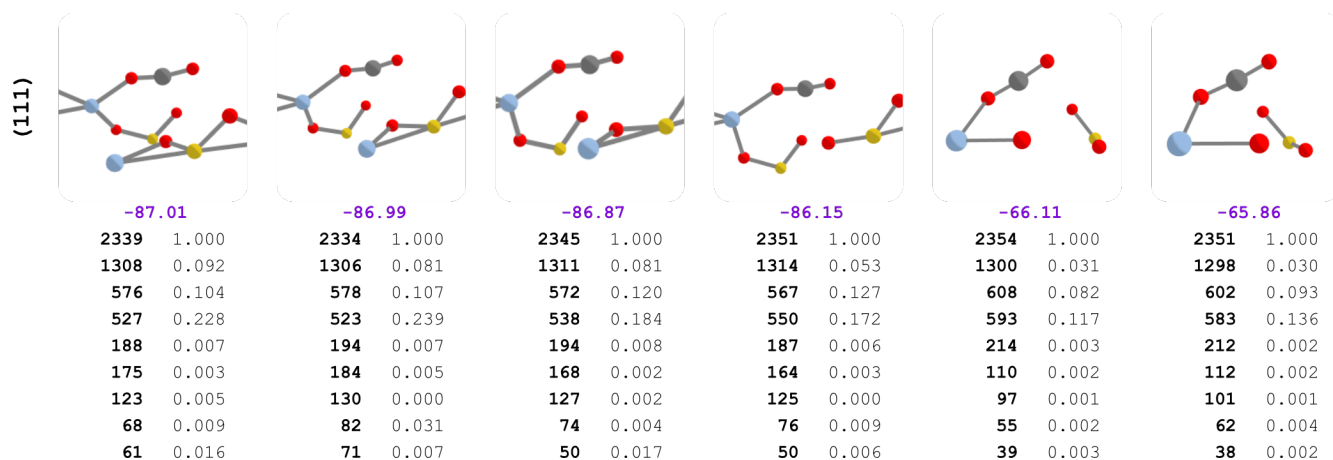

**Figure S7.** Atomic representations of the 6 CO<sub>2</sub> adsorption configurations displaying the lowest adsorption energies on the (111) surface of Mg<sub>2</sub>SiO<sub>4</sub> in our calculations. Only atoms within a radius of 4 Å from the C center are displayed. Adsorption energies are denoted in purple, in kJ mol<sup>-1</sup>. The arising spectroscopic features from these adsorptions are displayed under the adsorption energy, where the first column is the wavenumber in cm<sup>-1</sup>, and the second column is the normalized intensity. Blue, dark yellow, red and gray balls represent Mg, Si, O and C atoms, respectively.

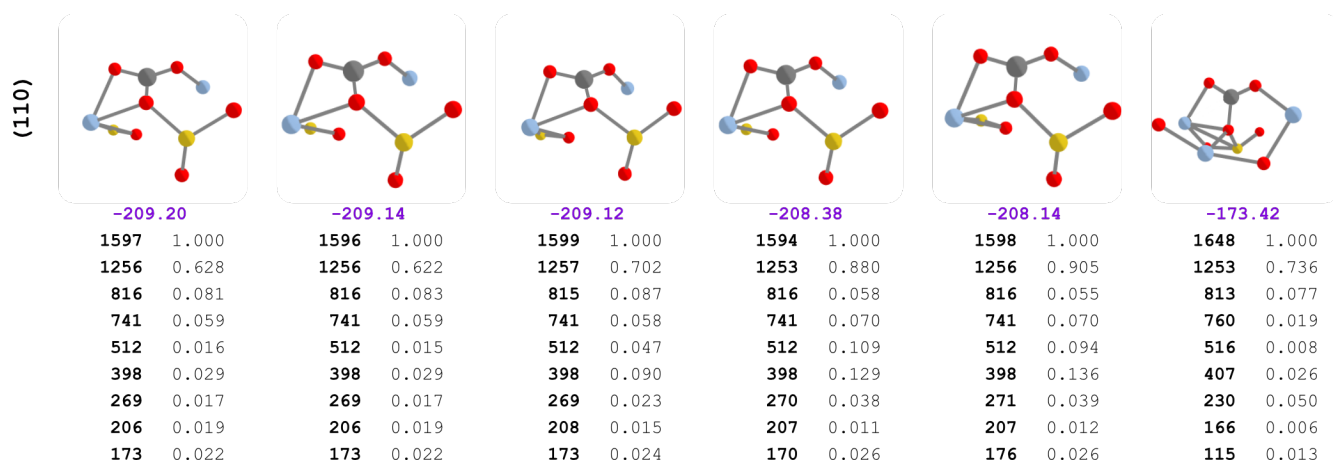

**Figure S8.** Atomic representations of the 6 CO<sub>2</sub> adsorption configurations displaying the lowest adsorption energies on the (110) surface of Mg<sub>2</sub>SiO<sub>4</sub> in our calculations. Only atoms within a radius of 4 Å from the C center are displayed. Adsorption energies are denoted in purple, in kJ mol<sup>-1</sup>. The arising spectroscopic features from these adsorptions are displayed under the adsorption energy, where the first column is the wavenumber in cm<sup>-1</sup>, and the second column is the normalized intensity. Blue, dark yellow, red and gray balls represent Mg, Si, O and C atoms, respectively.

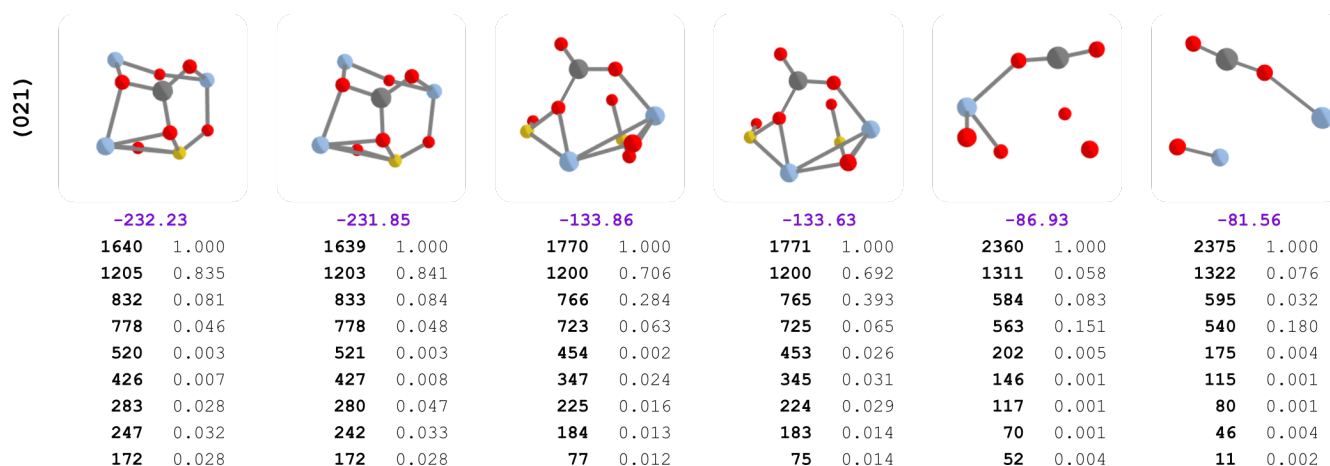

**Figure S9.** Atomic representations of the 6 CO<sub>2</sub> adsorption configurations displaying the lowest adsorption energies on the (021) surface of Mg<sub>2</sub>SiO<sub>4</sub> in our calculations. Only atoms within a radius of 4 Å from the C center are displayed. Adsorption energies are denoted in purple, in kJ mol<sup>-1</sup>. The arising spectroscopic features from these adsorptions are displayed under the adsorption energy, where the first column is the wavenumber in cm<sup>-1</sup>, and the second column is the normalized intensity. Blue, dark yellow, red and gray balls represent Mg, Si, O and C atoms, respectively.

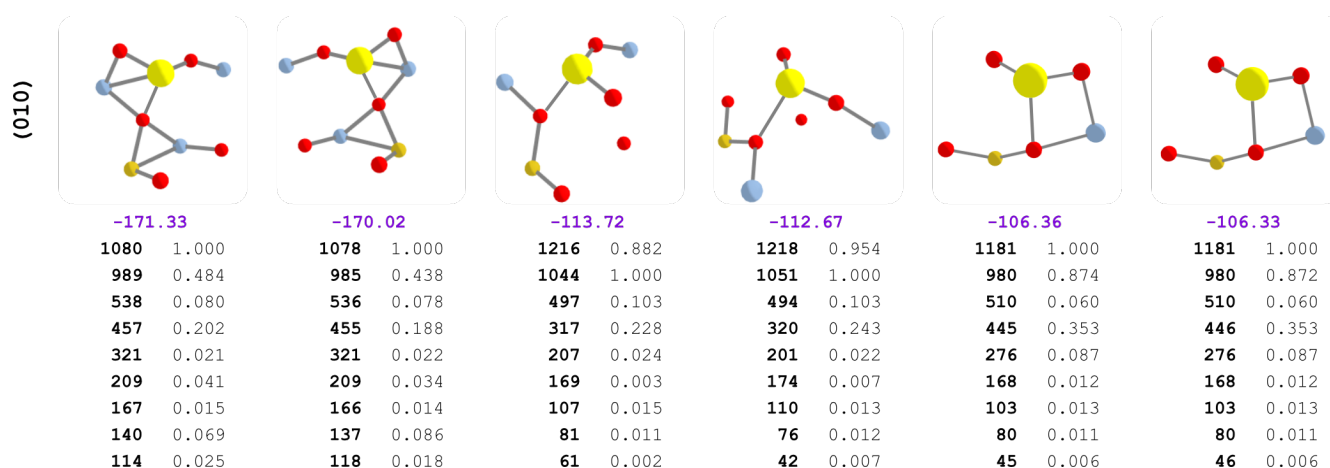

**Figure S10.** Atomic representations of the 6 SO<sub>2</sub> adsorption configurations displaying the lowest adsorption energies on the (010) surface of Mg<sub>2</sub>SiO<sub>4</sub> in our calculations. Only atoms within a radius of 4 Å from the S center are displayed. Adsorption energies are denoted in purple, in kJ mol<sup>-1</sup>. The arising spectroscopic features from these adsorptions are displayed under the adsorption energy, where the first column is the wavenumber in cm<sup>-1</sup>, and the second column is the normalized intensity. Blue, dark yellow, red and light yellow balls represent Mg, Si, O and S atoms, respectively.

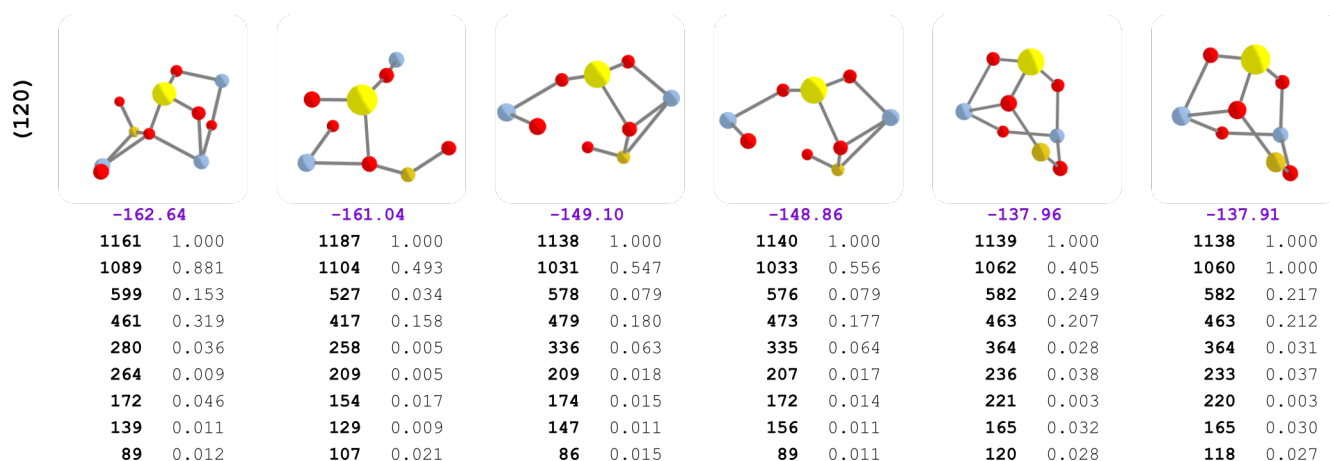

**Figure S11.** Atomic representations of the 6  $\text{SO}_2$  adsorption configurations displaying the lowest adsorption energies on the (120) surface of  $\text{Mg}_2\text{SiO}_4$  in our calculations. Only atoms within a radius of 4 Å from the S center are displayed. Adsorption energies are denoted in purple, in  $\text{kJ mol}^{-1}$ . The arising spectroscopic features from these adsorptions are displayed under the adsorption energy, where the first column is the wavenumber in  $\text{cm}^{-1}$ , and the second column is the normalized intensity. Blue, dark yellow, red and light yellow balls represent Mg, Si, O and S atoms, respectively.

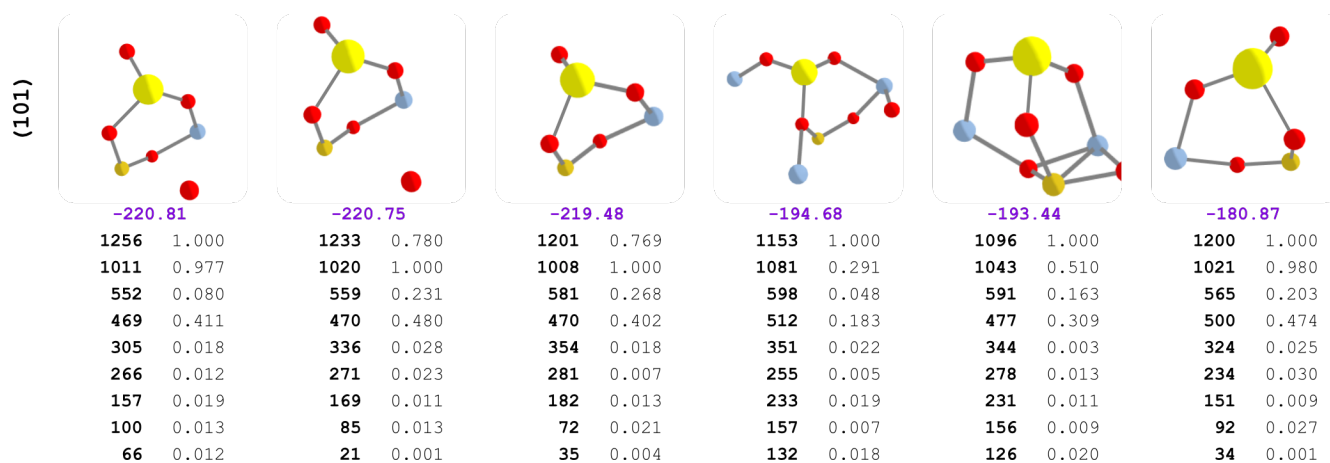

**Figure S12.** Atomic representations of the 6  $\text{SO}_2$  adsorption configurations displaying the lowest adsorption energies on the (101) surface of  $\text{Mg}_2\text{SiO}_4$  in our calculations. Only atoms within a radius of 4 Å from the S center are displayed. Adsorption energies are denoted in purple, in  $\text{kJ mol}^{-1}$ . The arising spectroscopic features from these adsorptions are displayed under the adsorption energy, where the first column is the wavenumber in  $\text{cm}^{-1}$ , and the second column is the normalized intensity. Blue, dark yellow, red and light yellow balls represent Mg, Si, O and S atoms, respectively.

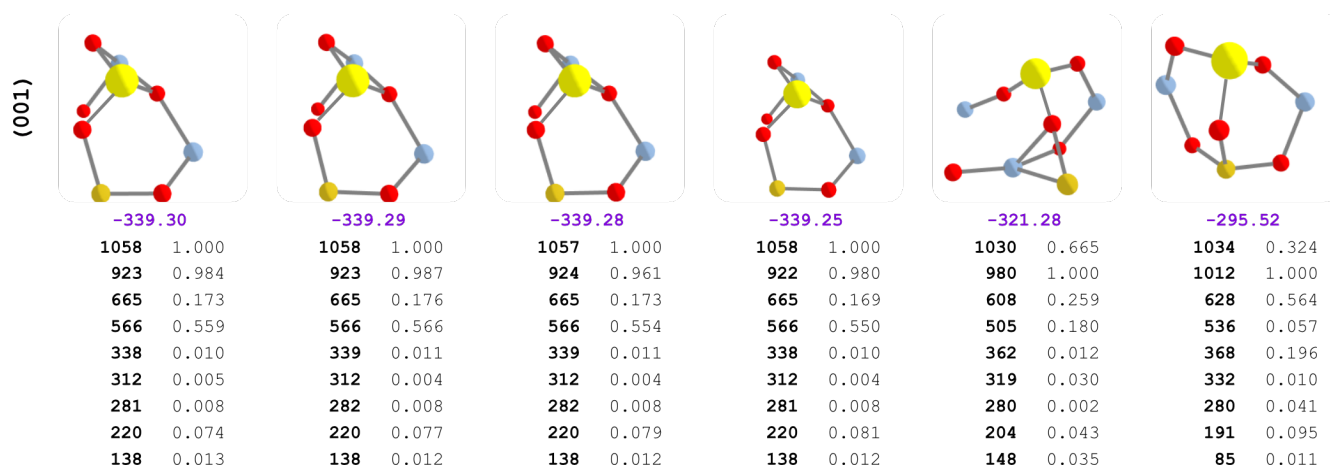

**Figure S13.** Atomic representations of the 6  $\text{SO}_2$  adsorption configurations displaying the lowest adsorption energies on the (001) surface of  $\text{Mg}_2\text{SiO}_4$  in our calculations. Only atoms within a radius of 4 Å from the S center are displayed. Adsorption energies are denoted in purple, in  $\text{kJ mol}^{-1}$ . The arising spectroscopic features from these adsorptions are displayed under the adsorption energy, where the first column is the wavenumber in  $\text{cm}^{-1}$ , and the second column is the normalized intensity. Blue, dark yellow, red and light yellow balls represent Mg, Si, O and S atoms, respectively.

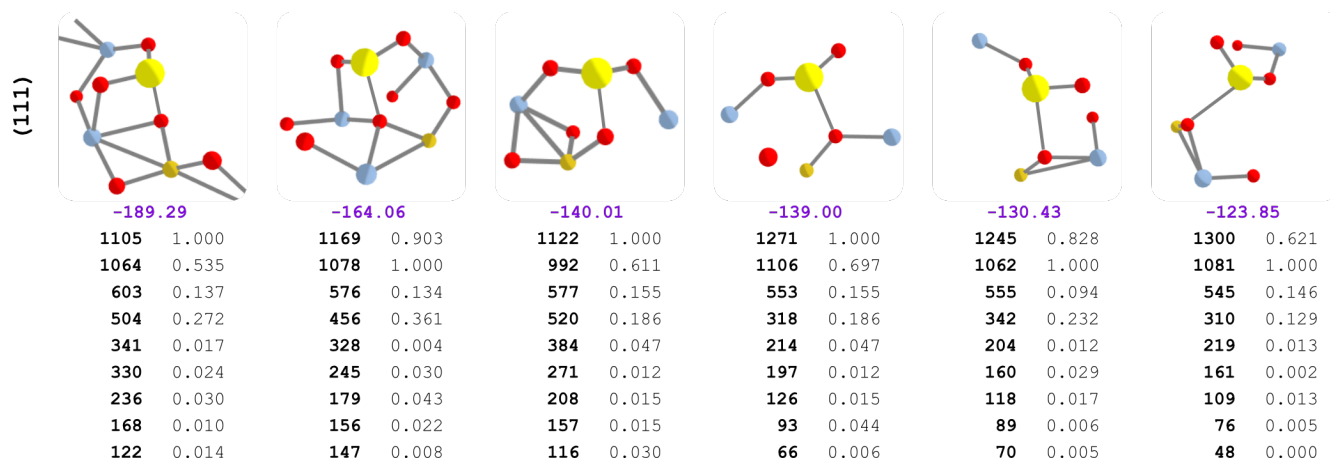

**Figure S14.** Atomic representations of the 6  $\text{SO}_2$  adsorption configurations displaying the lowest adsorption energies on the (111) surface of  $\text{Mg}_2\text{SiO}_4$  in our calculations. Only atoms within a radius of 4 Å from the S center are displayed. Adsorption energies are denoted in purple, in  $\text{kJ mol}^{-1}$ . The arising spectroscopic features from these adsorptions are displayed under the adsorption energy, where the first column is the wavenumber in  $\text{cm}^{-1}$ , and the second column is the normalized intensity. Blue, dark yellow, red and light yellow balls represent Mg, Si, O and S atoms, respectively.

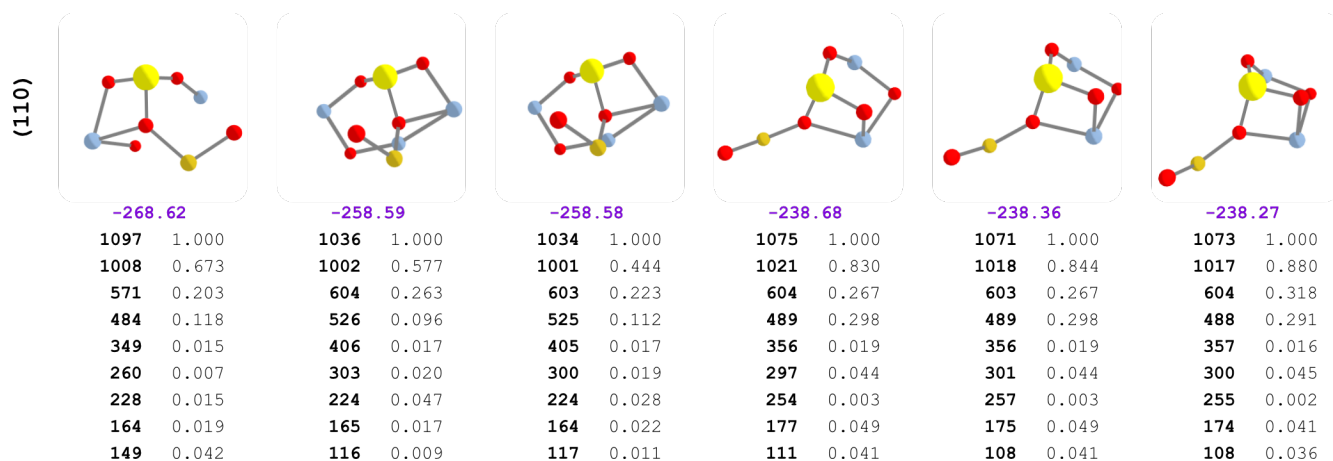

**Figure S15.** Atomic representations of the 6  $\text{SO}_2$  adsorption configurations displaying the lowest adsorption energies on the (110) surface of  $\text{Mg}_2\text{SiO}_4$  in our calculations. Only atoms within a radius of 4 Å from the S center are displayed. Adsorption energies are denoted in purple, in  $\text{kJ mol}^{-1}$ . The arising spectroscopic features from these adsorptions are displayed under the adsorption energy, where the first column is the wavenumber in  $\text{cm}^{-1}$ , and the second column is the normalized intensity. Blue, dark yellow, red and light yellow balls represent Mg, Si, O and S atoms, respectively.

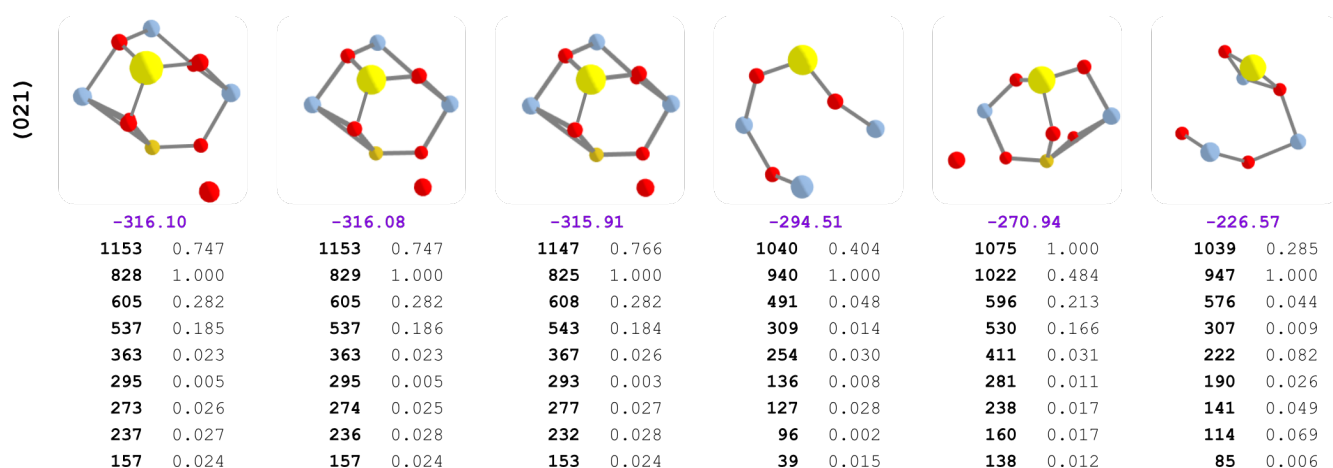

**Figure S16.** Atomic representations of the 6  $\text{SO}_2$  adsorption configurations displaying the lowest adsorption energies on the (021) surface of  $\text{Mg}_2\text{SiO}_4$  in our calculations. Only atoms within a radius of 4 Å from the S center are displayed. Adsorption energies are denoted in purple, in  $\text{kJ mol}^{-1}$ . The arising spectroscopic features from these adsorptions are displayed under the adsorption energy, where the first column is the wavenumber in  $\text{cm}^{-1}$ , and the second column is the normalized intensity. Blue, dark yellow, red and light yellow balls represent Mg, Si, O and S atoms, respectively.
